# Supplementary material for: A High-Performance Convolutional Neural Network for Ground-Level Ozone Estimation in Eastern China
Source: MDPI journal article supplement (doi:10.3390/rs14071640), 2022-03-29
Supplement: s1 [file s1]

# A High-Performance Convolutional Neural Network for Ground-Level Ozone Estimation in Eastern China

Sichen Wang <sup>1,2,3,4</sup>, Yanfeng Huo <sup>2,3,4,\*</sup>, Xi Mu <sup>1</sup>, Peng Jiang <sup>1,5</sup>, Shangpei Xun <sup>2</sup>, Binfang He <sup>2</sup>, Wenyu Wu <sup>2</sup>, Lin Liu <sup>6</sup> and Yonghong Wang <sup>7</sup>

## Affiliations

- <sup>1</sup> School of Resources and Environmental Engineering, Anhui University, Hefei 230601, China; x19301096@stu.ahu.edu.cn (S.W.); x20301066@stu.ahu.edu.cn (X.M.); jiangpeng@ahu.edu.cn (P.J.)
  - <sup>2</sup> Anhui Institute of Meteorological Sciences, Key Laboratory for Atmospheric Sciences & Remote Sensing of Anhui Province, Hefei 230031, China; xunshangpei@gmail.com (S.X.); hebinfang77@gmail.com (B.H.); wuweny2022@gmail.com (W.W.)
  - <sup>3</sup> Shouxian National Climate Observatory, Shouxian 232200, China
  - <sup>4</sup> Huaihe River Basin Typical Farmland Ecological Meteorological Field Science Experiment Base of China Meteorological Administration, Shouxian 232200, China
  - <sup>5</sup> Information Materials and Intelligent Sensing Laboratory of Anhui Province, Hefei 230601, China
  - <sup>6</sup> State Key Laboratory of Severe Weather (LASW) and Key Laboratory of Atmospheric Chemistry of CMA, Chinese Academy of Meteorological Sciences, Beijing 100081, China; linliu@cma.gov.cn
  - <sup>7</sup> Research Center for Eco-Environmental Sciences, Chinese Academy of Sciences, Beijing 100029, China; yonghongwang@rcees.ac.cn
- \* Correspondence: huoyf12@lzu.edu.cn; Tel.: +86-180-5510-8287

## The Supplementary Material Includes the Following (Pages 1–16):

1. Supporting Figures S1–S9 (Pages 1–12)
2. Supporting Table S1–S4 (Pages 13–16)

## Supplementary Figures

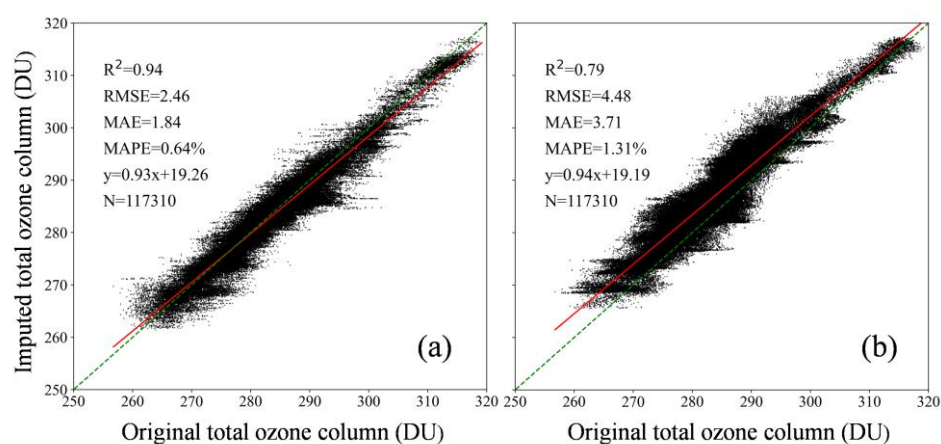

**Figure S1.** Scatter plot of impute total ozone column: (a) Kriging; (b) ERA5.

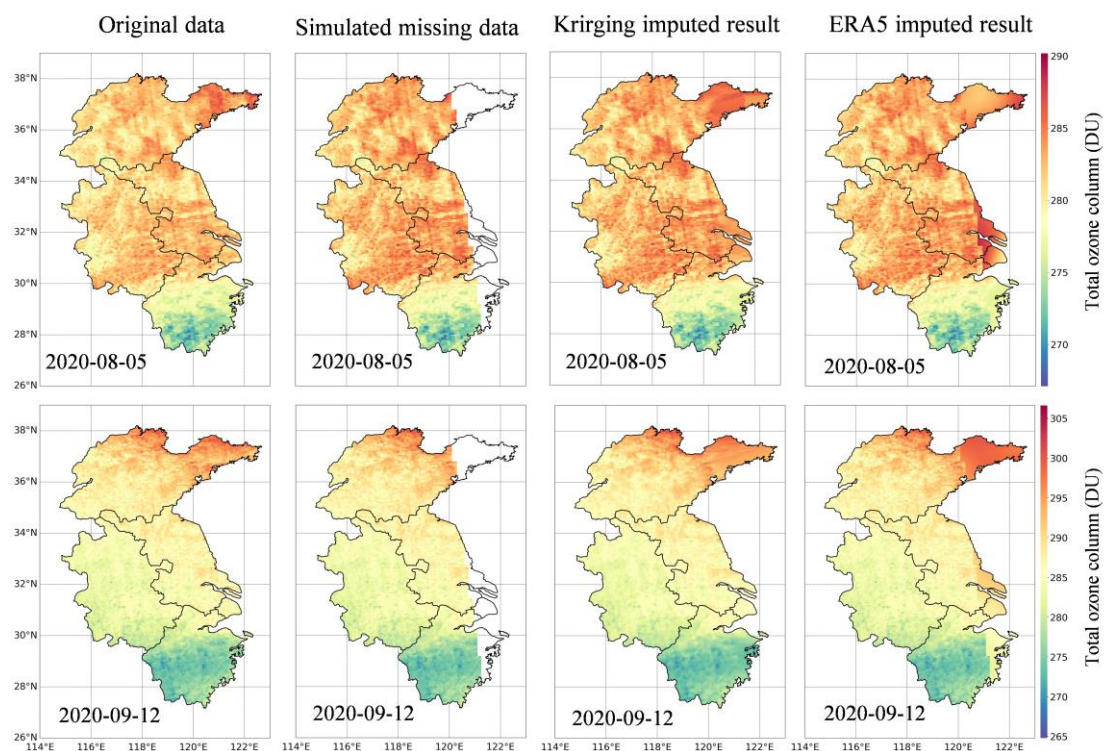

Figure S2. Imputed samples.

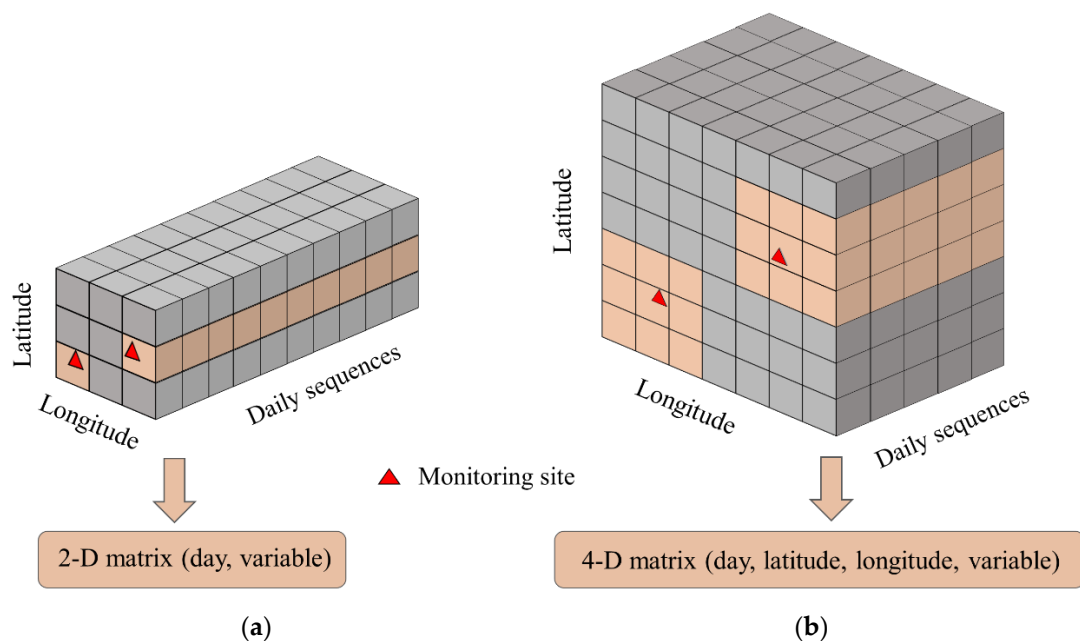

Figure S3. Spatiotemporal match methods: (a) 10-day single-point data; (b) 5-day spatiotemporal data.

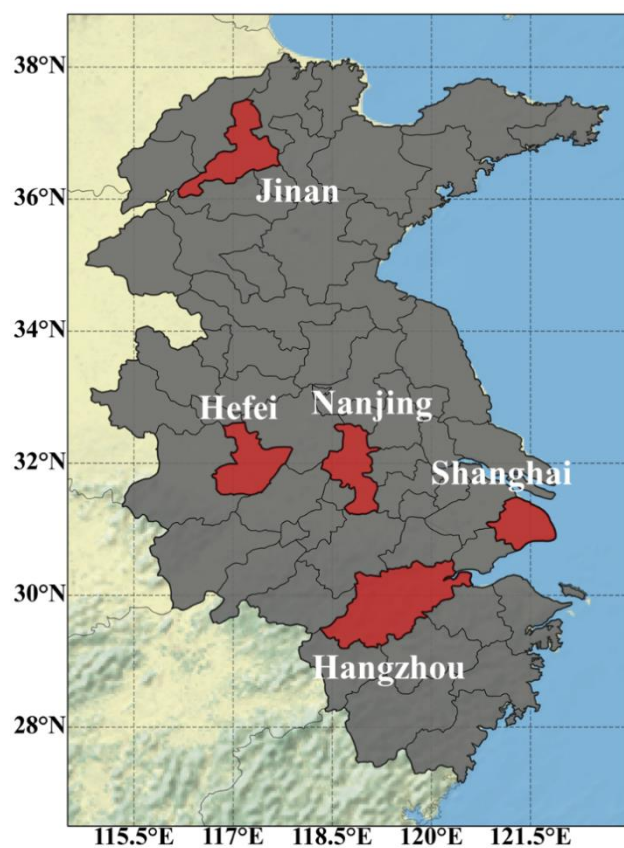

**Figure S4.** Geographical location of provincial capital cities (Jinan, Nanjing, Hangzhou, and Hefei) and Shanghai.

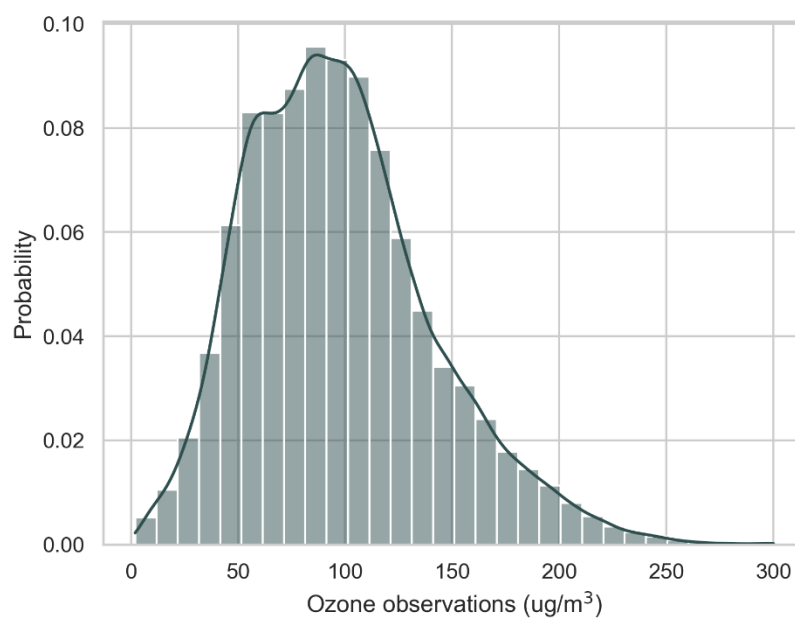

**Figure S5.** Probability histogram of ozone observations.

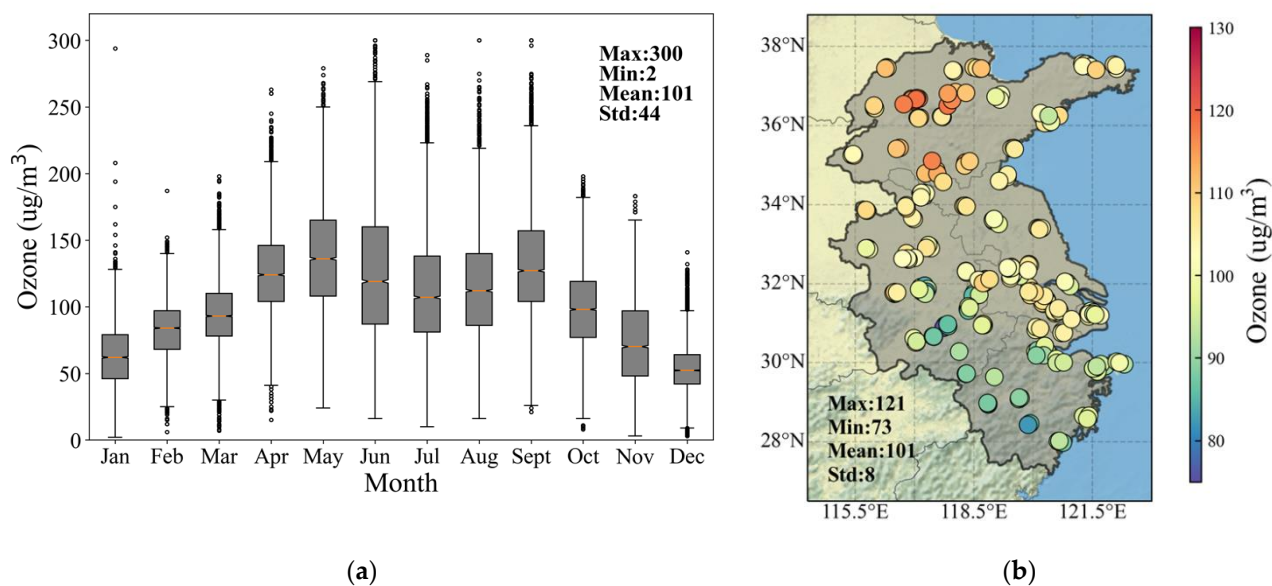

Figure S6. (a) Monthly and (b) spatial variations of ozone measurements.

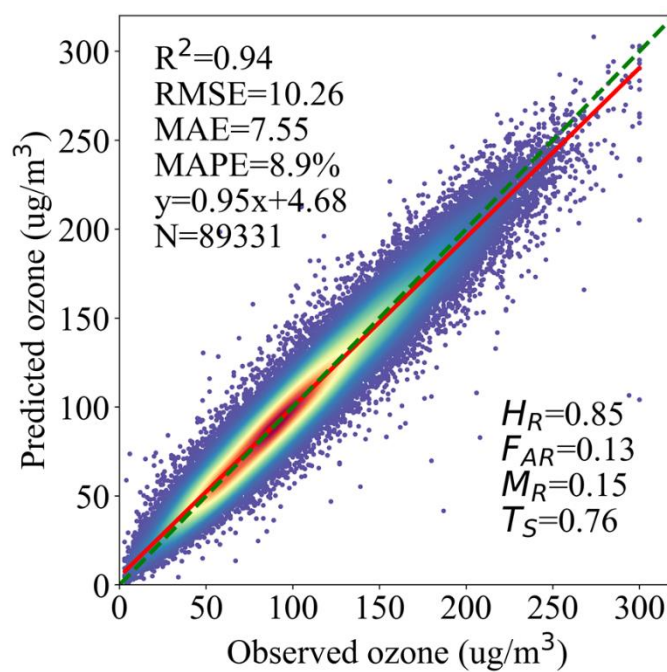

Figure S7. Model fitting results.



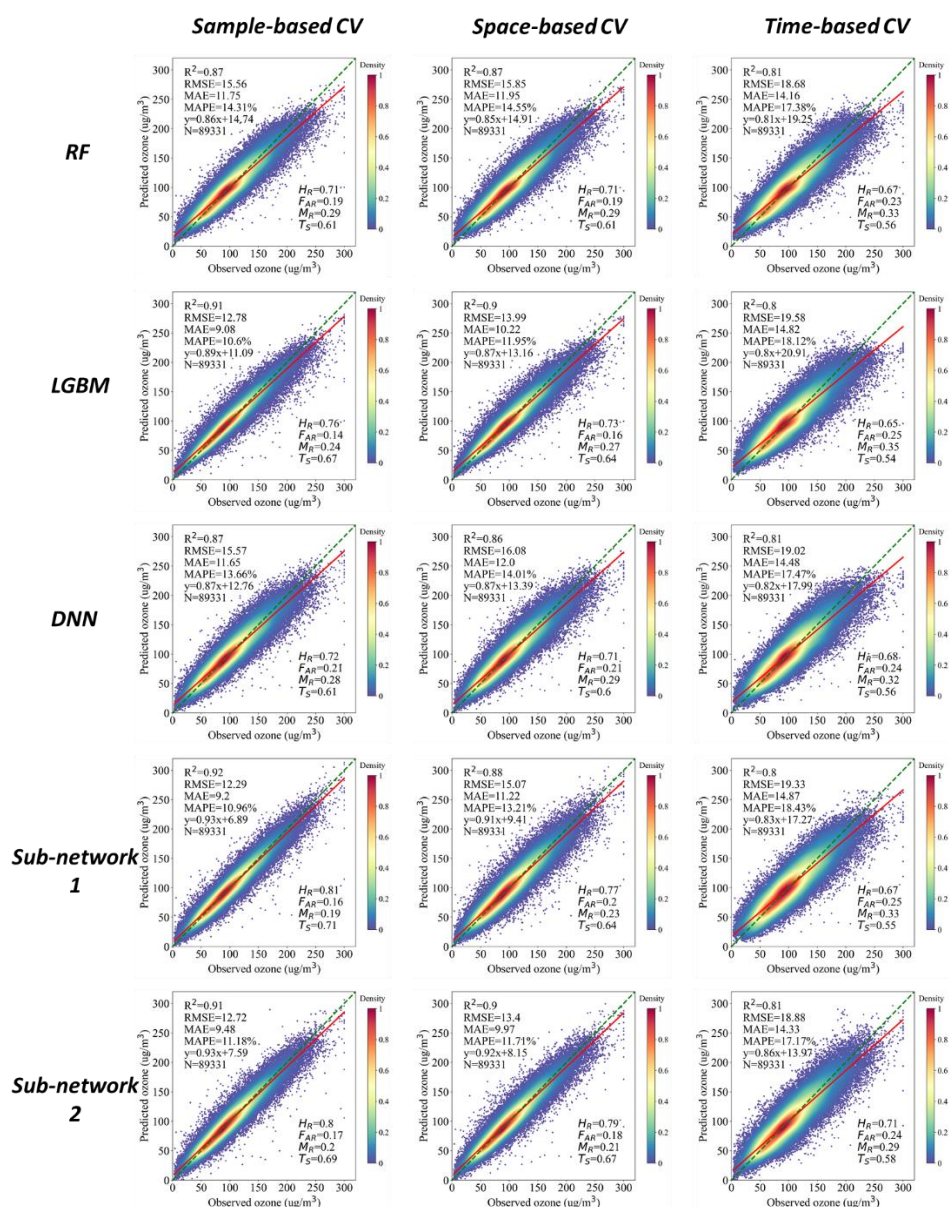

Figure S8. Density scatter plots of models' CV results.

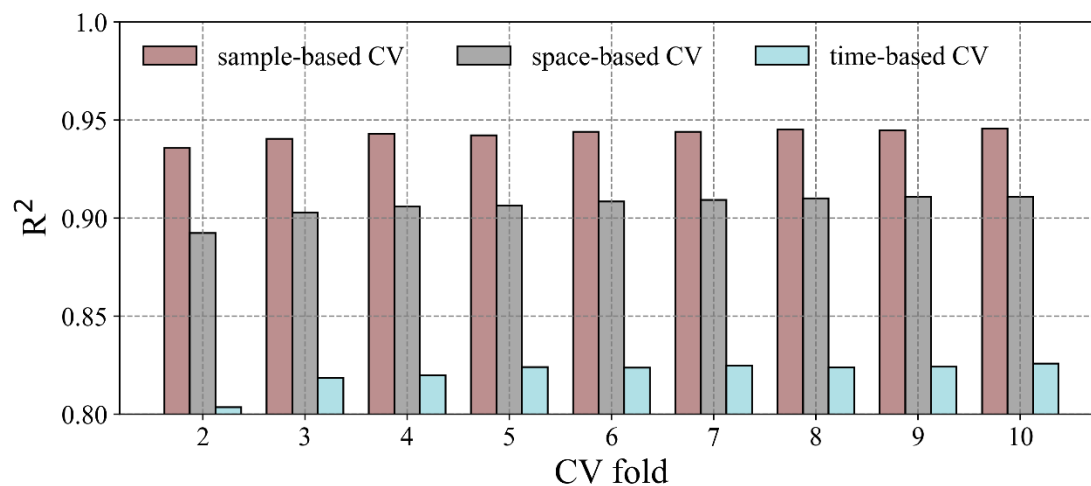

Figure S9. Validation results of different CV fold values.

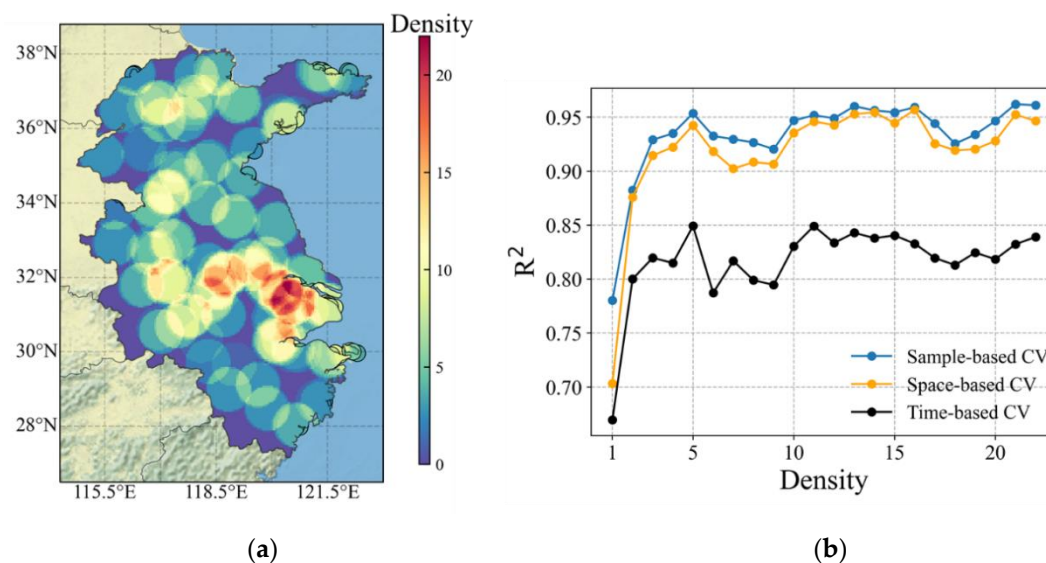

**Figure S10.** (a) Spatial density of ground-level monitoring sites and (b) CV results of sites with different densities.

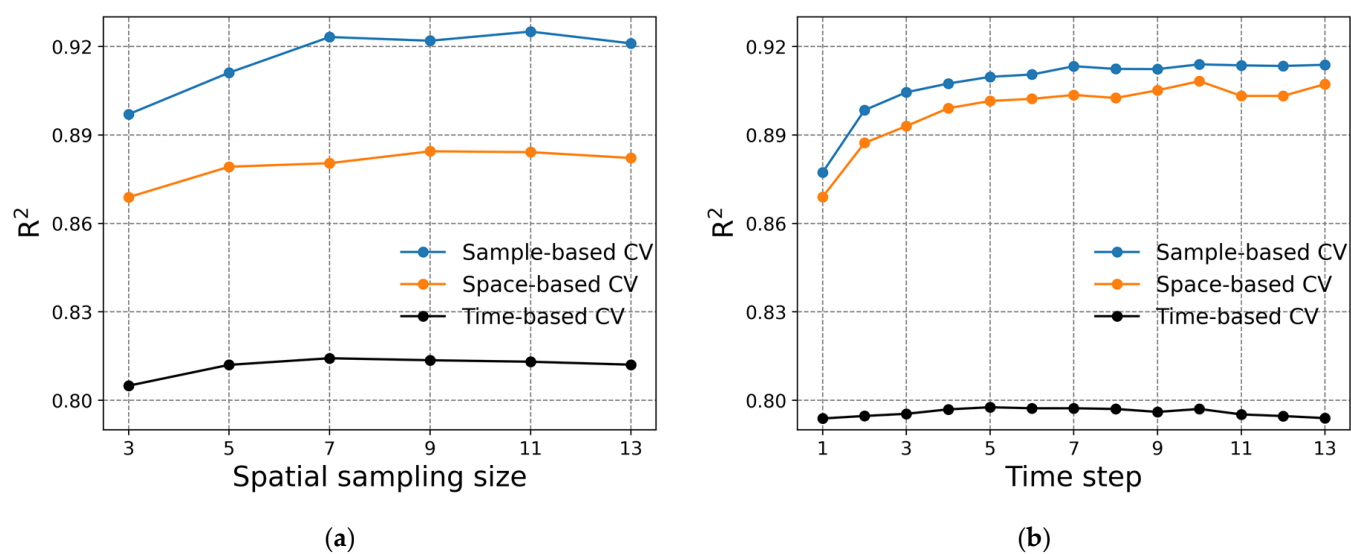

**Figure S11.** Variations of CV  $R^2$  values: (a) time steps; (b) spatial sampling sizes.

## Supplementary Tables

Table S1. Data descriptions.

| Variable             | Description                                      | Unit               | Spatial Resolution | Temporal Resolution | Source                                                            |
|----------------------|--------------------------------------------------|--------------------|--------------------|---------------------|-------------------------------------------------------------------|
| Ozone                | Ground-level measurement                         | ug/m <sup>3</sup>  | -                  | Hourly              | CNEMC                                                             |
| TROPMI-ozone         | Tropospheric Monitoring Instrument's total ozone | mol/m <sup>2</sup> | 5.5 × 3.5 km       | Daily               | Copernicus Open Access Hub                                        |
| PRE                  | 1 hour precipitation                             | mm/h               | 0.0625° × 0.0625°  | Hourly              | China Meteorological Administration Land Data Assimilation System |
| SP                   | Surface pressure                                 | Pa                 |                    |                     |                                                                   |
| SH                   | Specific humidity                                | kg/kg              |                    |                     |                                                                   |
| DSR                  | Downward shortwave radiation flux                | W/m <sup>2</sup>   |                    |                     |                                                                   |
| TMP                  | 2 m temperature                                  | K                  |                    |                     |                                                                   |
| WIN                  | 10 m wind speed                                  | m/s                |                    |                     |                                                                   |
| DPT                  | 2 m dew point temperature                        | K                  | 0.25° × 0.25°      | Hourly              | ERA5                                                              |
| BLH                  | Boundary layer height                            | m                  |                    |                     |                                                                   |
| WRF-ozone            | WRF-Chem ozone simulation                        | ug/m <sup>3</sup>  | 6 × 6 km           | Hourly              | Regional Atmospheric Environmental Modeling System                |
| WRF-PM <sub>25</sub> | WRF-Chem PM <sub>25</sub> simulation             | ug/m <sup>3</sup>  |                    |                     |                                                                   |
| WRF-NO <sub>2</sub>  | WRF-Chem NO <sub>2</sub> simulation              | ug/m <sup>3</sup>  |                    |                     |                                                                   |
| NDVI                 | Normalized difference vegetation index           |                    | 250 × 250 m        | 16 day              | MODIS                                                             |
| DEM                  | Surface elevation                                | m                  | 90 × 90 m          | -                   | SRTM                                                              |
| DOY                  | Day of year                                      | -                  | -                  | -                   | -                                                                 |

Table S2. Statistical descriptions of input variables.

| Variable             | Unit               | Model Building |          |          | Data Grid Generation |          |          |
|----------------------|--------------------|----------------|----------|----------|----------------------|----------|----------|
|                      |                    | Min            | Max      | Mean     | Min                  | Max      | Mean     |
| TROPMI-ozone         | mol/m <sup>2</sup> | 0.102          | 0.198    | 0.132    | 0.100                | 0.201    | 0.131    |
| PRE                  | mm/h               | 0.0            | 28.2     | 0.14     | 0.0                  | 31.6     | 0.71     |
| SP                   | Pa                 | 88645.1        | 103803.7 | 101139.3 | 78771.4              | 103896.5 | 100177.3 |
| SH                   | kg/kg              | 0.00039        | 0.02788  | 0.01005  | 0.00032              | 0.03016  | 0.00995  |
| DSR                  | W/m <sup>2</sup>   | 34.4           | 1109.9   | 447.7    | 25.6                 | 1114.6   | 458.5    |
| TMP                  | K                  | 252.2          | 313.0    | 293.2    | 250.6                | 313.9    | 293.0    |
| WIN                  | m/s                | 0.06           | 15.15    | 2.08     | 0.02                 | 16.86    | 2.00     |
| DPT                  | K                  | 247.2          | 301.9    | 283.8    | 245.7                | 302.3    | 283.3    |
| BLH                  | m                  | 58.4           | 3758.8   | 997.3    | 27.3                 | 3912.0   | 1028.6   |
| WRF-ozone            | ug/m <sup>3</sup>  | 0.0            | 327.2    | 102.5    | 0.0                  | 345.2    | 109.2    |
| WRF-PM <sub>25</sub> | ug/m <sup>3</sup>  | 0.0            | 330.2    | 34.0     | 0.0                  | 334.7    | 25.0     |
| WRF-NO <sub>2</sub>  | ug/m <sup>3</sup>  | 0.0            | 181.2    | 30.0     | 0.0                  | 184.1    | 11.6     |
| NDVI                 | -                  | -0.36          | 0.90     | 0.32     | -0.49                | 1.01     | 0.49     |
| DEM                  | m                  | 1.0            | 556.0    | 50.75    | 1.0                  | 1508.0   | 125.18   |
| DOY                  | -                  | 10             | 366      | 188      | 10                   | 366      | 188      |

**Table S3.** Comparison between 2-D CNN and sub-network 2.

| Model         | Total Parameters | Sample-Based R <sup>2</sup> | Space-Based R <sup>2</sup> | Time-Based R <sup>2</sup> |
|---------------|------------------|-----------------------------|----------------------------|---------------------------|
| 2-D CNN       | 58608            | 0.892                       | 0.855                      | 0.785                     |
| Sub-network 2 | 59958            | 0.921                       | 0.884                      | 0.811                     |

**Table S4.** Comparison between 1-D CNN, GRU and LSTM.

| Model   | Configuration <sup>1</sup> | Total Parameters | Sample-Based R <sup>2</sup> | Space-Based R <sup>2</sup> | Time-Based R <sup>2</sup> |
|---------|----------------------------|------------------|-----------------------------|----------------------------|---------------------------|
| 1-D CNN | 32/16/8/32/1               | 8281             | 0.894                       | 0.883                      | 0.773                     |
|         | 64/32/16/32/1              | 20849            | 0.912                       | 0.901                      | 0.801                     |
|         | 80/40/20/32/1              | 32605            | 0.916                       | 0.905                      | 0.803                     |
| GRU     | 32/16/10/32/1              | 8329             | 0.891                       | 0.885                      | 0.788                     |
|         | 60/20/10/32/1              | 20125            | 0.916                       | 0.909                      | 0.806                     |
|         | 70/30/25/32/1              | 32590            | 0.918                       | 0.904                      | 0.802                     |
| LSTM    | 25/16/10/32/1              | 8253             | 0.898                       | 0.882                      | 0.785                     |
|         | 50/20/10/32/1              | 20505            | 0.911                       | 0.902                      | 0.803                     |
|         | 60/30/15/32/1              | 32465            | 0.915                       | 0.903                      | 0.807                     |

<sup>1</sup> The number of neurons/filters in each layer, and the last two layers are fully connected layers.
